# Supplementary material
Source: HighWire-hosted journal article supplement (https://jnm.snmjournals.org/highwire/filestream/95131/field_highwire_adjunct_files/0/191122_Supplemental_Data.pdf)
Supplement: 191122_Supplemental_Data.pdf [file 191122_Supplemental_Data.pdf]

# Supplemental Figure 1

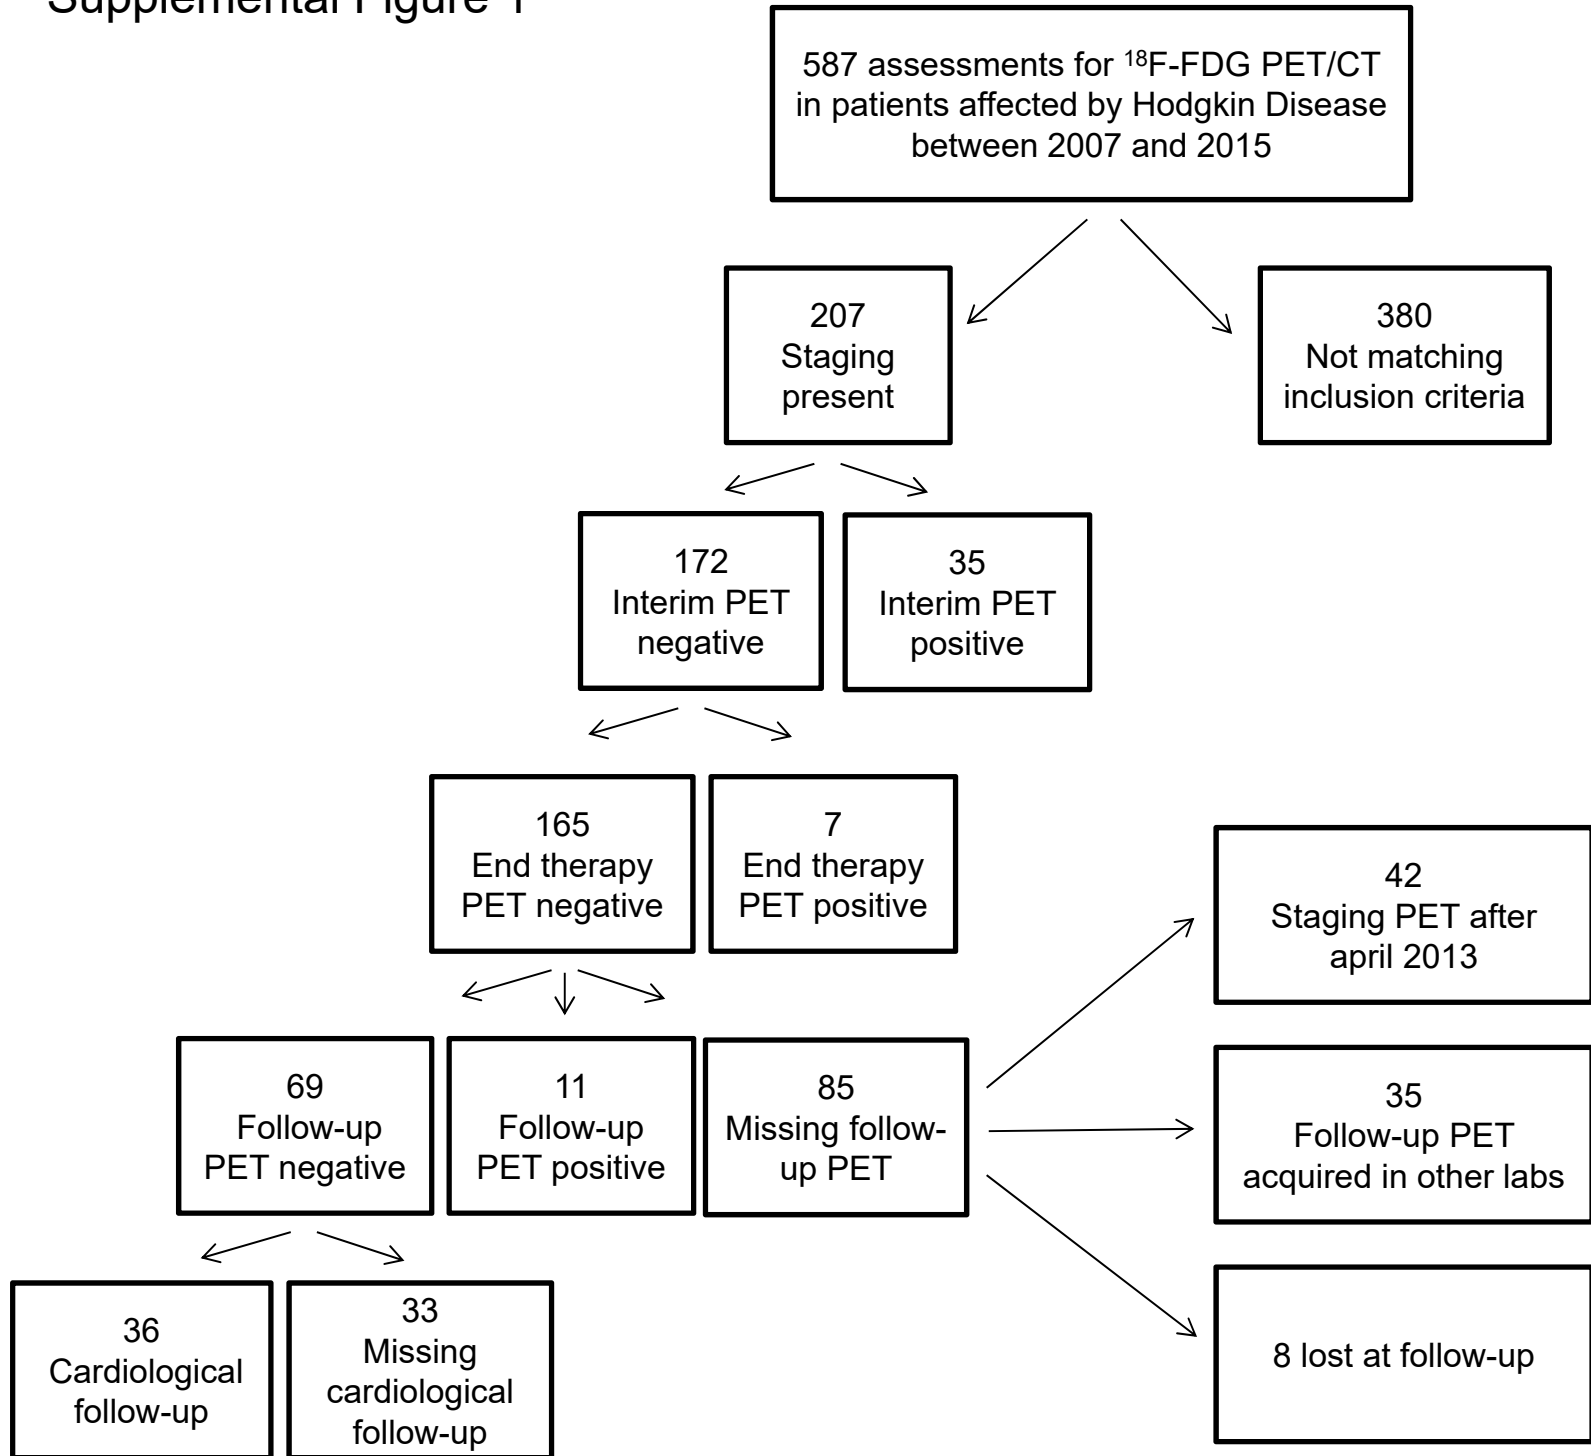

# Supplemental Figure 2

## A

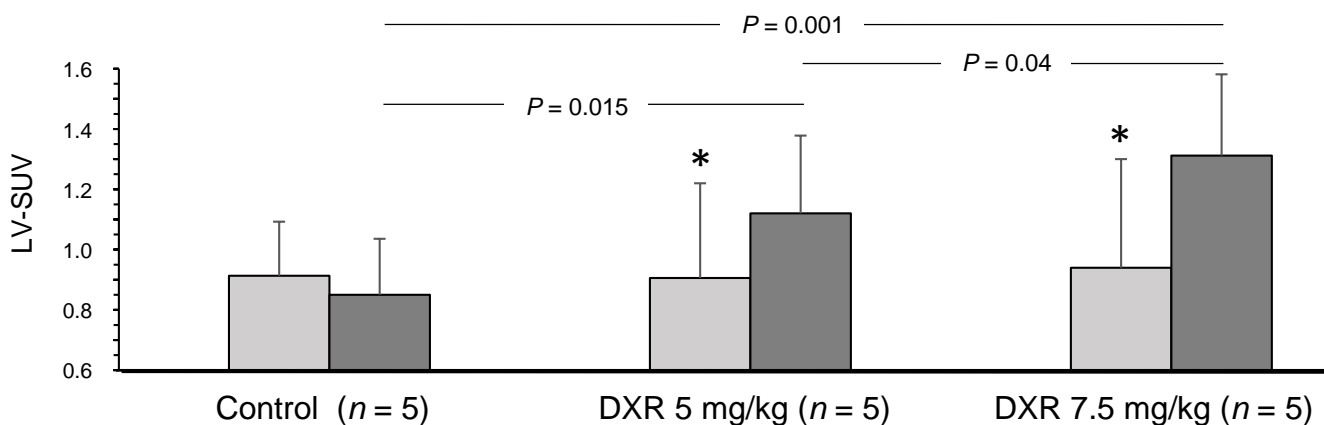

## B

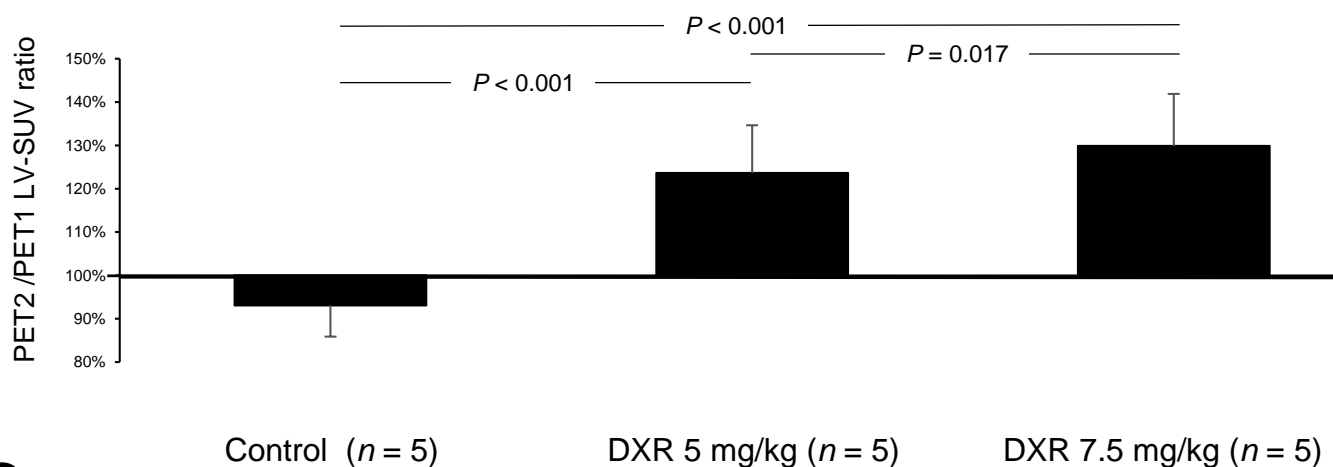

## C

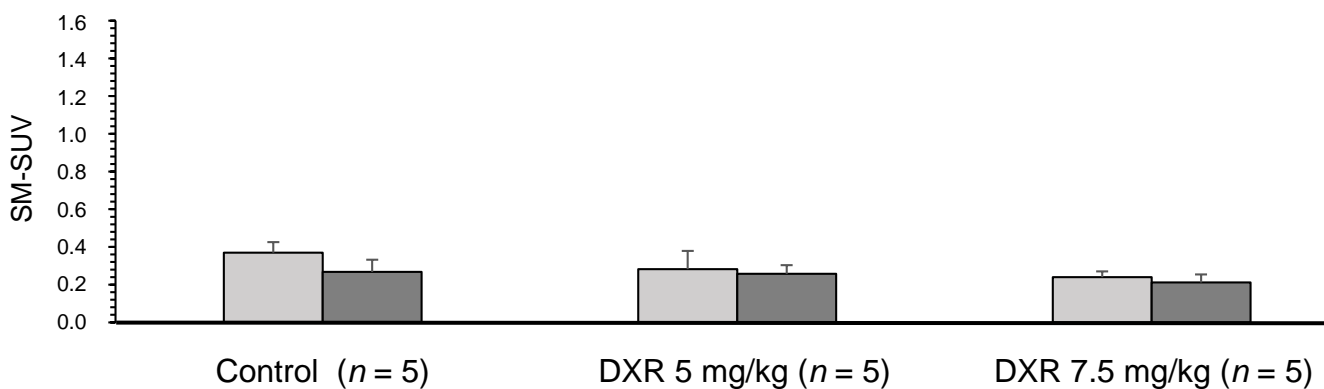

Supplemental Figure 3

A

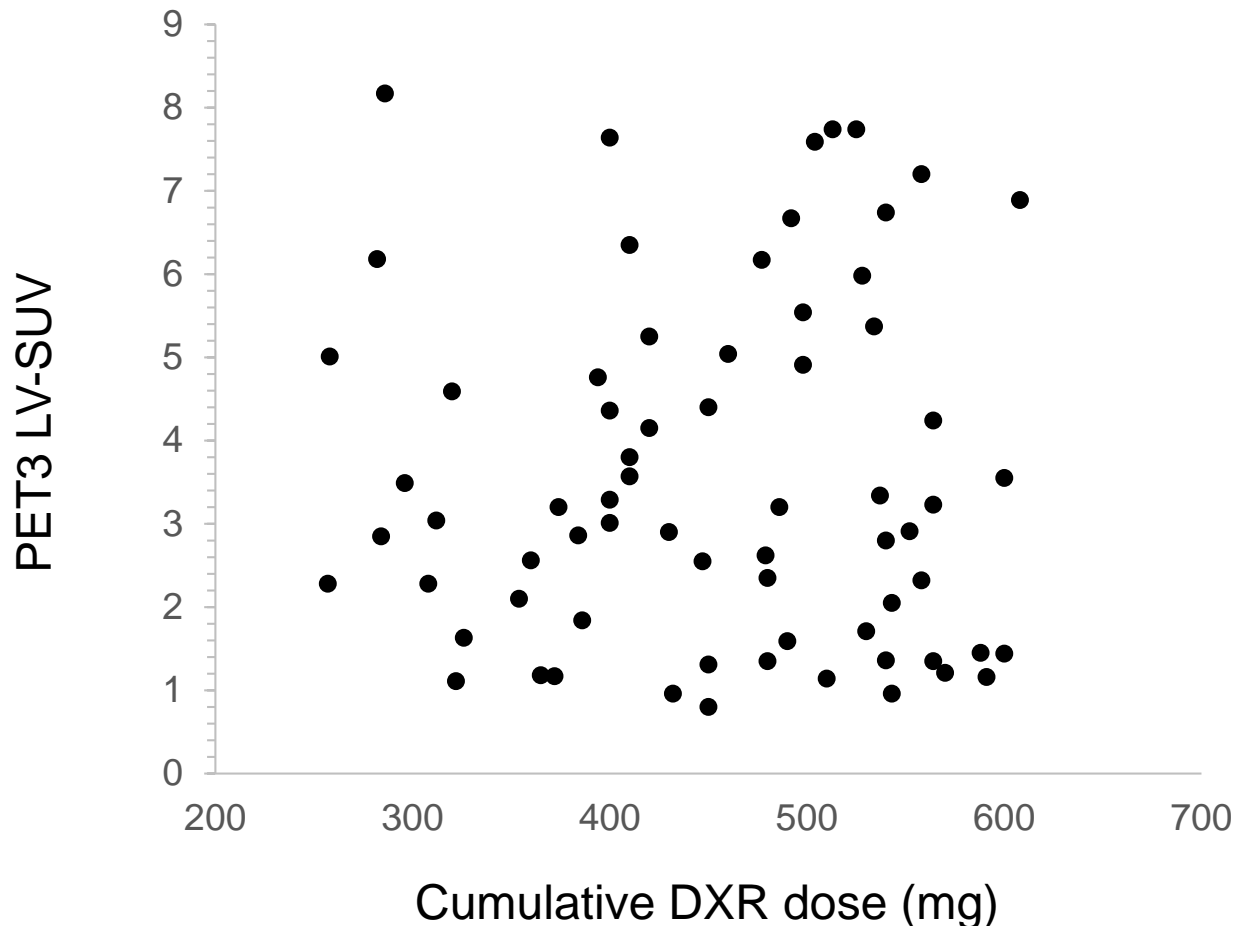

B

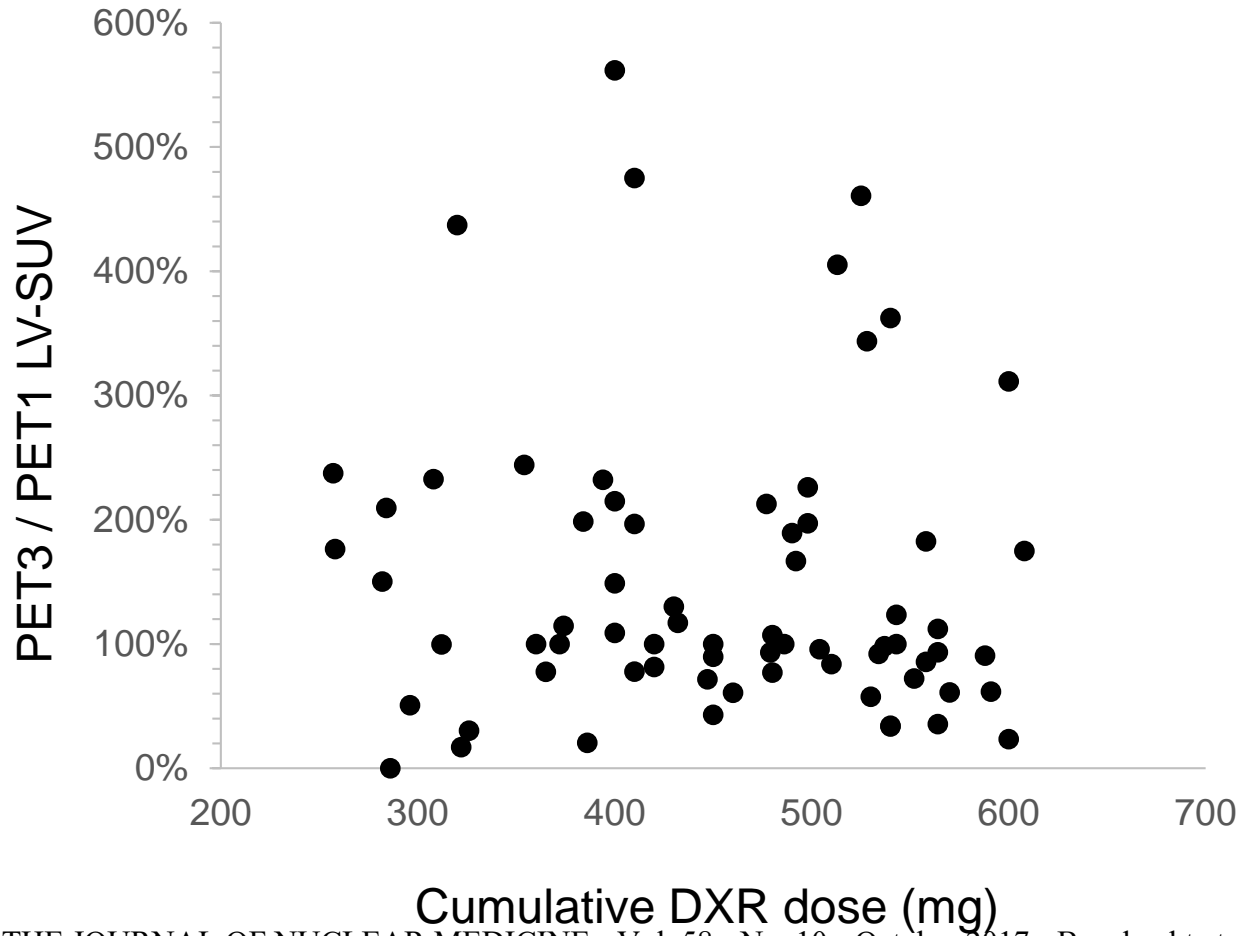

**Supplementary Table 1: Baseline clinical characteristics of enrolled HD and excluded patients.**

|                                           | Enrolled HD (n=69)    | Excluded HD (n=138)  |                              |                       |
|-------------------------------------------|-----------------------|----------------------|------------------------------|-----------------------|
|                                           |                       | PET2 positive (n=35) | PET3 or PET4 positive (n=18) | Missing PET4 (n=85)   |
| Age                                       | 39 ± 13 (range 19-58) | 34 ± 9 (range 17-64) | 36 ± 8 (range 23-48)         | 52 ± 21 (range 27-66) |
| Male Sex                                  | 37/69 (53%)           | 24/35 (68%)          | 12/18 (66%)                  | 45/85 (52%)           |
| Weight (Kg)                               | 67.1 ± 12             | 64.6 ± 8             | 72.8 ± 14                    | 75.2 ± 9              |
| Glycemia at FDG injection (mg/dl)         | 79 ± 7                | 71 ± 10              | 67 ± 19                      | 82 ± 15               |
| <i>Cardiovascular Risk Profile</i>        |                       |                      |                              |                       |
| Hypertension                              | 6/69 (8%)             | 5/35 (14%)           | 2/18 (11%)                   | 29/85 (34%)           |
| Tobacco Use                               | 19/69 (27%)           | 10/35 (28%)          | 4/18 (22%)                   | 14/85 (16%)           |
| Total Cholesterol                         | 183.7 ± 30            | 173.4 ± 19           | 201.4 ± 62                   | 196.8 ± 54            |
| LDL                                       | 114.5 ± 32            | 109 ± 15             | 107 ± 47                     | 132.1 ± 52            |
| Triglycerides                             | 121.3 ± 49            | 115.9 ± 55           | 140 ± 76                     | 191.6 ± 103           |
| Creatinine                                | 0.8 ± 0.1             | 1.1 ± 0.4            | 0.9 ± 0.2                    | 1.1 ± 0.4             |
| Family history of CAD                     | 7/69 (10%)            | 7/35 (20%)           | 2/18 (11%)                   | 14/85 (16%)           |
| <i>Time intervals between PET studies</i> |                       |                      |                              |                       |
| PET1 - PET2 (days)                        | 73.7 ± 21             | 69.9 ± 32            | 79.3 ± 15                    | 76.1 ± 22             |
| PET2 - PET3 (days)                        | 148 ± 70              | 117.5 ± 101          | 156.1 ± 91                   | 141.2 ± 71            |
| PET3 - PET4 (days)                        | 195 ± 92              | 116.5 ± 143          | 122.9 ± 134                  | -                     |
| <i>Baseline Ann-Arbor Staging</i>         |                       |                      |                              |                       |
| I Stage                                   | 7/69 (10%)            | 1/35 (2%)            | 0/18 (0%)                    | 21/85 (24%)           |
| II Stage                                  | 42/69 (60%)           | 12/35 (34%)          | 9/18 (50%)                   | 31/85 (36%)           |
| III Stage                                 | 8/69 (12%)            | 12/35 (34%)          | 7/18 (38%)                   | 19/85 (22%)           |
| IV Stage                                  | 12/69 (17%)           | 10/35 (28%)          | 2/18 (11%)                   | 14/85 (16%)           |
| B symptoms                                | 10/69 (14%)           | 4/35 (11%)           | 6/18 (33%)                   | 33/85 (38%)           |
